# Supplementary material for: Structural investigation of nickel polyphosphate coacervate glass–ceramics
Source: Royal Society of Chemistry journal article supplement (doi:10.1039/c6ra20696d), 2016-01-01
Supplement: c6ra20696d1.pdf [file c6ra20696d1.pdf]

## Supplementary material

**Table 1** Agreement factors,  $R_{wp}$  and Gof (goodness-of-fit) of Rietveld refinement

| Samples    | $R_{wp}$ (%) | Gof  |
|------------|--------------|------|
| NiPC(EtOH) | 3.27         | 1.07 |
| NiPC(DMK)  | 4.92         | 1.61 |
| NiPC(MeOH) | 3.12         | 1.05 |
| NiPC(MEG)  | 6.23         | 1.69 |

**Table 2** Space group and Unit cell obtained with Rietveld refinement

| Samples            | Delta                                                                       | $Ni_2P_4O_{12}$                                                           | Beta                                                                     |
|--------------------|-----------------------------------------------------------------------------|---------------------------------------------------------------------------|--------------------------------------------------------------------------|
| <b>Space Group</b> | P21/a                                                                       | C12/c                                                                     | C12/m                                                                    |
| <b>NiPC(EtOH)</b>  | a = 5.2044(5) Å<br>b = 9.887(1) Å<br>c = 4.4648(3) Å<br>Be = 97.536(6) (°)  | a = 11.564(5) Å<br>b = 8.195(6) Å<br>c = 9.905(7) Å<br>Be = 118.85(4) (°) |                                                                          |
| <b>NiPC(DMK)</b>   | a = 5.2014(2) Å<br>b = 9.880(4) Å<br>c = 4.461(1) Å<br>Be = 97.55(2) (°)    | a = 11.610(1) Å<br>b = 8.229(1) Å<br>c = 9.828(2) Å<br>Be = 118.58(1) (°) |                                                                          |
| <b>NiPC(MeOH)</b>  | a = 5.2048(4) Å<br>b = 9.8944(8) Å<br>c = 4.4638(4) Å<br>Be = 97.488(4) (°) |                                                                           |                                                                          |
| <b>NiPC(MEG)</b>   | a = 5.2064(2) Å<br>b = 9.900(1) Å<br>c = 4.4697(6) Å<br>Be = 97.60(1) (°)   | a = 11.621(1) Å<br>b = 8.230(1) Å<br>c = 9.845(1) Å<br>Be = 118.58(1) (°) | a = 6.499(4) Å<br>b = 8.372(6) Å<br>c = 4.482(2) Å<br>Be = 103.95(5) (°) |

**Table 3** Selected Ni-O-O bond angles (°) for the Ni<sub>2</sub>P<sub>4</sub>O<sub>12</sub> crystalline phase

| Samples   | Ni <sub>2</sub> P <sub>4</sub> O <sub>12</sub> |          |             |          |             |
|-----------|------------------------------------------------|----------|-------------|----------|-------------|
|           | Ni-O2-O1                                       | Ni-O3-O2 | Ni-O4-O3    | Ni-O5-O4 | Ni-O6-O5    |
| NiP(EtOH) | 180                                            | 90(3)    | 180         | 100(30)  | 180.000(1)  |
| NiP(DMK)  | 180                                            | 90(3)    | 180         | 99(3)    | 180         |
| NiP(MEG)  | 180                                            | 88(3)    | 180.0000(1) | 103(4)   | 180.0000(2) |

**Table 4** Selected P-O-O bond angles (°) for the Ni<sub>2</sub>P<sub>4</sub>O<sub>12</sub> crystalline phase

| Samples    | Ni <sub>2</sub> P <sub>4</sub> O <sub>12</sub> |         |         |         |
|------------|------------------------------------------------|---------|---------|---------|
|            | P-O1-O2                                        | P-O3-O1 | P-O4-O3 | P-O5-O4 |
| NiPC(EtOH) | 120(6)                                         | 110(8)  | 110(5)  | 160(6)  |
| NiPC(DMK)  | 112(4)                                         | 109(6)  | 110(5)  | 151(5)  |
| NiPC(MEG)  | 113(5)                                         | 110(6)  | 109(4)  | 156(5)  |

**Table 5** Selected P-O bond lengths (Å) for the Ni<sub>2</sub>P<sub>4</sub>O<sub>12</sub> crystalline phase

| Samples    | Ni <sub>2</sub> P <sub>4</sub> O <sub>12</sub> |         |         |         |         |
|------------|------------------------------------------------|---------|---------|---------|---------|
|            | P-O1                                           | P-O2    | P-O3    | P-O4    | P-O5    |
| NiPC(EtOH) | 1.5(2)                                         | 1.5(13) | 1.6(10) | 1.6(1)  | 3.1(1)  |
| NiPC(DMK)  | 1.48(8)                                        | 1.55(9) | 1.51(1) | 1.49(1) | 3.20(7) |
| NiPC(MEG)  | 1.56(1)                                        | 1.49(1) | 1.54(1) | 1.57(1) | 3.19(1) |

**Table 6** Selected Ni-O bond lengths (Å) for the Ni<sub>2</sub>P<sub>4</sub>O<sub>12</sub> crystalline phase

| Samples   | Ni <sub>2</sub> P <sub>4</sub> O <sub>12</sub> |         |         |         |         |         |
|-----------|------------------------------------------------|---------|---------|---------|---------|---------|
|           | Ni-O1                                          | Ni-O2   | Ni-O3   | Ni-O4   | Ni-O5   | Ni-O6   |
| NiP(EtOH) | 2.0(8)                                         | 2.0(8)  | 2.1(6)  | 2.1(6)  | 2.2(1)  | 2.2(1)  |
| NiP(DMK)  | 2.00(1)                                        | 2.00(1) | 2.11(6) | 2.11(6) | 2.18(1) | 2.18(1) |
| NiP(MEG)  | 2.01(9)                                        | 2.01(9) | 2.16(1) | 2.16(1) | 2.13(9) | 2.13(9) |

**Table 7** Selected Ni-O-O bond angles (°) for the δ-Ni<sub>2</sub>P<sub>2</sub>O<sub>7</sub> crystalline phase

| Samples   | δ-Ni <sub>2</sub> P <sub>2</sub> O <sub>7</sub> |          |          |          |           |
|-----------|-------------------------------------------------|----------|----------|----------|-----------|
|           | Ni-O1-O2                                        | Ni-O4-O1 | Ni-O3-O4 | Ni-O5-O3 | Ni-O6-O5  |
| NiP(EtOH) | 81(2)                                           | 157(2)   | 104(2)   | 77.1(9)  | 113.1(17) |
| NiP(DMK)  | 81(5)                                           | 157(5)   | 106(5)   | 77(2)    | 113(4)    |
| NiP(MeOH) | 80.5(2)                                         | 156.0(2) | 106.1(1) | 77.1(7)  | 112.1(1)  |
| NiP(MEG)  | 79(2)                                           | 151.7(2) | 107(2)   | 77.6(7)  | 112(2)    |

**Table 8** Selected P-O-O bond angles (°) for the δ-Ni<sub>2</sub>P<sub>2</sub>O<sub>7</sub> crystalline phase

| Samples   | δ-Ni <sub>2</sub> P <sub>2</sub> O <sub>7</sub> |         |         |           |         |
|-----------|-------------------------------------------------|---------|---------|-----------|---------|
|           | P-O3-O1                                         | P-O2-O3 | P-O4-O2 | P-O6-O4   | P-O5-O6 |
| NiP(EtOH) | 111(3)                                          | 110(3)  | 103(3)  | 179.2(18) | 98.1(2) |
| NiP(DMK)  | 111(8)                                          | 112(8)  | 103(6)  | 179(5)    | 98(3)   |
| NiP(MeOH) | 110(3)                                          | 110(2)  | 105(2)  | 178.7(2)  | 98.4(2) |
| NiP(MEG)  | 114(3)                                          | 112(3)  | 105(2)  | 178(2)    | 99.5(1) |

**Table 9** Selected P-O bond angles (Å) for the  $\delta$ -Ni<sub>2</sub>P<sub>2</sub>O<sub>7</sub> crystalline phase

| Samples   | $\delta$ -Ni <sub>2</sub> P <sub>2</sub> O <sub>7</sub> |         |         |         |         |         |
|-----------|---------------------------------------------------------|---------|---------|---------|---------|---------|
|           | P-O1                                                    | P-O2    | P-O3    | P-O4    | P-O5    | P-O6    |
| NiP(EtOH) | 1.49(6)                                                 | 1.53(7) | 1.50(3) | 1.55(2) | 3.08(6) | 2.89(7) |
| NiP(DMK)  | 1.50(1)                                                 | 1.54(1) | 1.49(9) | 1.57(8) | 3.11(1) | 2.86(1) |
| NiP(MeOH) | 1.50(5)                                                 | 1.53(5) | 1.53(3) | 1.54(2) | 3.06(5) | 2.90(5) |
| NiP(MEG)  | 1.54(7)                                                 | 1.52(6) | 1.53(3) | 1.56(3) | 3.04(7) | 2.85(5) |

**Table 10** Selected Ni-O bond angles (Å) for the  $\delta$ -Ni<sub>2</sub>P<sub>2</sub>O<sub>7</sub> crystalline phase

| Samples   | $\delta$ -Ni <sub>2</sub> P <sub>2</sub> O <sub>7</sub> |         |         |         |         |         |
|-----------|---------------------------------------------------------|---------|---------|---------|---------|---------|
|           | Ni-O1                                                   | Ni-O2   | Ni-O3   | Ni-O4   | Ni-O5   | Ni-O6   |
| NiP(EtOH) | 2.03(6)                                                 | 2.05(6) | 2.15(2) | 2.12(7) | 2.15(4) | 2.16(6) |
| NiP(DMK)  | 2.02(1)                                                 | 2.02(1) | 2.13(7) | 2.10(1) | 2.15(1) | 2.17(1) |
| NiP(MeOH) | 2.04(5)                                                 | 2.02(4) | 2.14(2) | 2.10(5) | 2.14(3) | 2.18(5) |
| NiP(MEG)  | 2.05(7)                                                 | 2.08(5) | 2.17(3) | 2.14(5) | 1.99(3) | 2.18(7) |

**Table 11** Selected Ni-O bond angles (°) for the  $\beta$ -Ni<sub>2</sub>P<sub>2</sub>O<sub>7</sub> crystalline phase

| Samples  | $\beta$ -Ni <sub>2</sub> P <sub>2</sub> O <sub>7</sub> |          |          |          |          |
|----------|--------------------------------------------------------|----------|----------|----------|----------|
|          | Ni-O2-O1                                               | Ni-O3-O2 | Ni-O4-O3 | Ni-O5-O4 | Ni-O6-O5 |
| NiP(MEG) | 80(1)                                                  | 97(7)    | 96(9)    | 114(6)   | 168(9)   |
|          | P-O2-O1                                                | P-O3-O2  | P-O4-O3  | P-O5-O4  |          |
| NiP(MEG) | 109(6)                                                 | 111(1)   | 110(7)   | 69(1)    |          |

**Table 12** Selected Ni-O bond lengths (Å) for the  $\beta$ -Ni<sub>2</sub>P<sub>2</sub>O<sub>7</sub> crystalline phase

| Samples         | $\beta$ -Ni <sub>2</sub> P <sub>2</sub> O <sub>7</sub> |         |         |          |         |         |
|-----------------|--------------------------------------------------------|---------|---------|----------|---------|---------|
|                 | Ni-O1                                                  | Ni-O2   | Ni-O3   | Ni-O4    | Ni-O5   | Ni-O6   |
| <b>NiP(MEG)</b> | 1.97(2)                                                | 1.97(2) | 2.11(1) | 2.11(15) | 2.24(2) | 2.24(2) |
|                 | P-O1                                                   | P-O2    | P-O3    | P-O4     | P-O5    |         |
| <b>NiP(MEG)</b> | 1.53(8)                                                | 1.53(2) | 1.53(2) | 1.6(3)   | 2.7(3)  |         |
